# Supplementary material for: Novel functional view of the crocidolite asbestos-treated A549 human lung epithelial transcriptome reveals an intricate network of pathways with opposing functions
Source: PubMed Central journal article supplement (PMC2533023; doi:10.1186/1471-2164-9-376), 2008-08-07

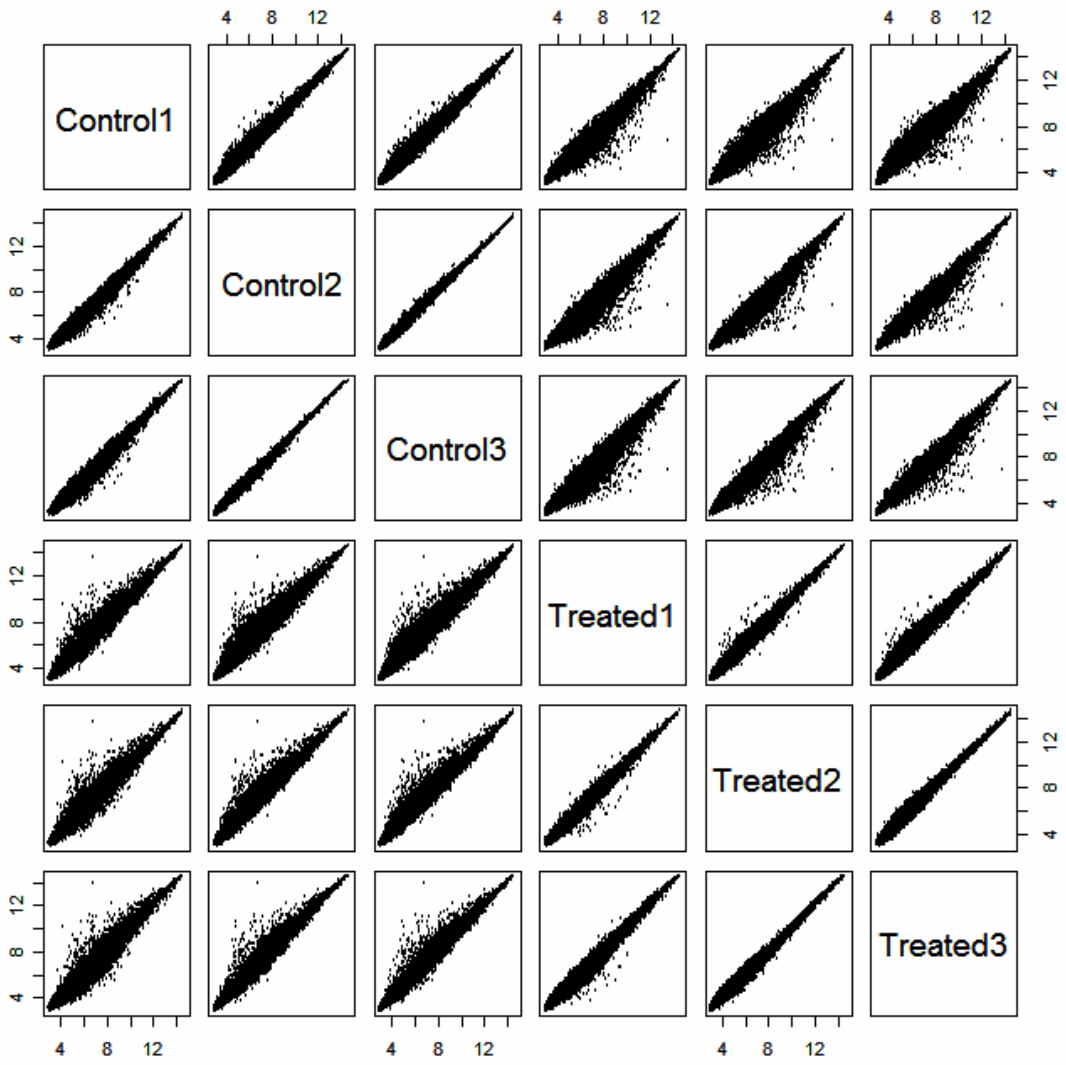

Supplement: 1471-2164-9-376-S1.pdf [file 1471-2164-9-376-S1.pdf]
